# Supplementary material for: Complexation driven synthesis of nickel ferrocyanide nanoparticles for non-enzymatic glucose sensing application using field effect transistors and microcontroller-based platforms
Source: Royal Society of Chemistry journal article supplement (doi:10.1039/d5nj00874c), 2025-01-01

## Supplementary information

Complexation driven synthesis of nickel ferrocyanide nanoparticles for non-enzymatic glucose sensing application using field effect transistor and microcontroller-based platform

**Figure S1:** Cyclic voltametric response of aniline-ferrocyanide modified working electrode in the absence and presence of glucose (4.0 mM).

**Figure: S1**

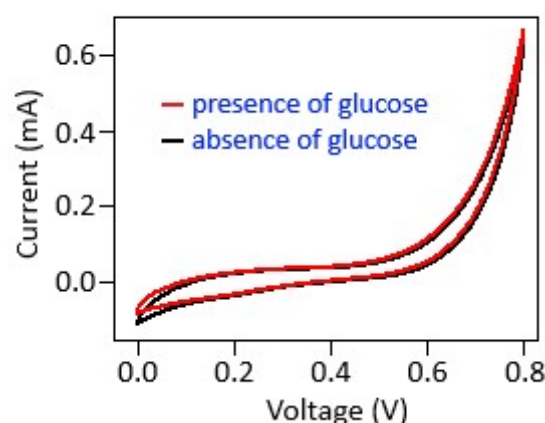

**Figure S2:** Real-time potentiometric response of the microcontroller based glucose sensor through ThingSpeak channel.

**Figure: S2**

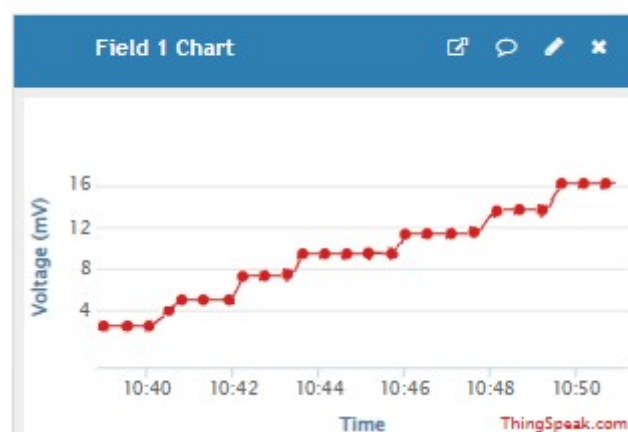

Supplement: d5nj00874c1.pdf [file d5nj00874c1.pdf]
